# Supplementary material for: Tripartite efflux pumps: energy is required for dissociation, but not assembly or opening of the outer membrane channel of the pump
Source: PubMed Central journal article supplement (PMC3664412; doi:10.1111/mmi.12211), 2013-04-09
Supplement: mmi0088-0590-SD1.pdf [file mmi0088-0590-SD1.pdf]

## Supplementary Information and Data

### TABLE S1: Strains and plasmids

| <b>Strains/ plasmids</b>         | <b>Description</b>                                                                                                                                                                                                                   | <b>Source</b>                  |
|----------------------------------|--------------------------------------------------------------------------------------------------------------------------------------------------------------------------------------------------------------------------------------|--------------------------------|
| <b><i>E. coli</i> strains</b>    |                                                                                                                                                                                                                                      |                                |
| BL21(DE3)                        | <i>F</i> , <i>ompT</i> , <i>hsdS</i> $\beta$ ( <i>r</i> $\beta$ - <i>m</i> $\beta$ -), <i>dcm</i> , <i>gal</i> , (DE3) <i>ton</i>                                                                                                    | Stratagene                     |
| KAM3(DE3)                        | Antibiotic sensitive host strain used for expression of pDuet vectors – $\Delta$ <i>acrB</i>                                                                                                                                         | Morita <i>et al.</i> , 1998    |
| ( $\Delta$ <i>tolC</i> )TG1      | Antibiotic sensitive host strain used for expression of pDuet vectors – $\Delta$ <i>tolC</i>                                                                                                                                         | Nagakubo <i>et al.</i> , 2002  |
| ( $\Delta$ <i>tolC</i> )TG1(DE3) | Antibiotic sensitive host strain used for expression of pDuet vectors – $\Delta$ <i>tolC</i>                                                                                                                                         | Janganan <i>et al.</i> , 2011a |
| ( $\Delta$ <i>acrB</i> )C43(DE3) | Antibiotic sensitive host strain used for expression of pDuet vectors – $\Delta$ <i>acrB</i>                                                                                                                                         | Gift from KM Pos.              |
| <b>Plasmid cloning vectors</b>   |                                                                                                                                                                                                                                      |                                |
| pET21a/pET24a                    | Expression of His-tagged proteins in <i>E. coli</i>                                                                                                                                                                                  | Novagen                        |
| pACYCDuet                        | Simultaneous expression of two proteins in <i>E. coli</i>                                                                                                                                                                            | Novagen                        |
| <b>Plasmid constructs</b>        |                                                                                                                                                                                                                                      |                                |
| pET21a-mtrE                      | <i>mtrE</i> cloned into pET21a(+) using NdeI-mtrE F and HindIII-mtrE R primers.                                                                                                                                                      | Janganan <i>et al.</i> , 2011a |
| pET21a-mtrD                      | <i>mtrD</i> cloned into pET21a(+) using NdeI-mtrD F and HindIII-mtrD R primers.                                                                                                                                                      | Janganan <i>et al.</i> , 2011a |
| pET21a-NT-mtrC                   | <i>mtrC</i> mutant, encoding a derivative truncated at position 34, cloned into pET21a(+) using NdeI- $\Delta$ 34-mtrC F and XhoI-mtrC R primers.                                                                                    | Janganan <i>et al.</i> , 2011a |
| pGEX6p-3 NT-MtrC (GST Tag)       | <i>mtrC</i> mutant, encoding a derivative truncated at position 34, cloned into pGEX6P-3 using BamHI- $\Delta$ 34-mtrC F and XhoI-mtrC R primers.                                                                                    | Janganan <i>et al.</i> , 2011a |
| pET24a-gIII-NT-mtrC              | <i>NT-mtrC</i> was cloned into pGEM-T using MtrC NT NcoI F and MtrC NT XhoI R primers; an <i>NcoI/XhoI</i> fragment was rescued and cloned into pBAD-gIIIC, from which <i>gIII-NT-mtrC</i> was amplified and ligated into pET24a(+). | This study                     |
| pET21a-mtrC hairpin              | A DNA fragment encoding the $\alpha$ -helical hairpin domain of MtrC was cloned into pET21a(+) using                                                                                                                                 | This study                     |

|                             |                                                                                                                                                                                                                                           |                                |
|-----------------------------|-------------------------------------------------------------------------------------------------------------------------------------------------------------------------------------------------------------------------------------------|--------------------------------|
|                             | NdeI-mtrC hairpin F and NdeI-mtrC hairpin R primers.                                                                                                                                                                                      |                                |
| pET24a-gIII-mtrC hairpin    | <i>mtrC-hairpin</i> was cloned into pGEM-T using MtrC NT NcoI F and MtrC NT XhoI R primers; an <i>NcoI/XhoI</i> fragment was rescued and cloned into pBAD-gIIIC, from which <i>gIII-hairpin</i> was amplified and ligated into pET24a(+). | This study                     |
| pACYCDuet-mtrE              | <i>mtrE</i> cloned into MCS1 of pACYCDuet using BamHI F and HindIII R primers.                                                                                                                                                            | This study                     |
| pACYCDuet-mtrD              | <i>mtrD</i> cloned into MCS1 of pACYCDuet using BamHI F and Sall R primers.                                                                                                                                                               | This study                     |
| pACYCDuet-mtrC/mtrE         | <i>mtrC</i> cloned into MCS1 of pACYCDuet using BamHI-mtrC F and HindIII-mtrC R primers; <i>mtrE</i> cloned into MCS2 of pACYCDuet using NdeI-mtrE F and KpnI-mtrE R primers.                                                             | This study                     |
| pACYCDuet-mtrC hairpin/mtrE | <i>mtrE</i> cloned into MCS1 of pACYCDuet, using BamHI F and HindIII R primers, and MtrC hairpin cloned into MCS2, with a gIII-sequence-NdeI forward and XhoI reverse primers.                                                            | This study                     |
| pACYCDuet-mtrC hairpin/mtrD | <i>mtrD</i> cloned into MCS1 of pACYCDuet, using BamHI F and Sall R primers, and MtrC hairpin cloned into MCS2, with gIII-sequence-NdeI forward and XhoI reverse primers                                                                  | This study                     |
| pACYCDuet-mtrC/mtrD         | <i>mtrC</i> cloned into MCS1 of pACYCDuet, using BamHI-Sall F; and <i>mtrD</i> cloned into MCS2, using NdeI-XhoI primers.                                                                                                                 | Janganan <i>et al.</i> , 2011a |
| pACYCDuet-mtrC/mtrD/mtrE    | <i>mtrCmtrE</i> cloned into MCS1 of pACYCDuet using BamHI-mtrC F, EcoRI-mtrC-SD-R, EcoRI-mtrE -ATG F and Sall-mtrE R; <i>mtrD</i> cloned into MCS2 of pACYCDuet using NdeI-mtrD F and KpnI-mtrD R.                                        | Janganan <i>et al.</i> , 2011a |

**TABLE S2: primers for mtrCDE constructions**

| <b>Constructs</b>                | <b>Primers</b>                                                                                                                                                                                                                                                                                                                    |
|----------------------------------|-----------------------------------------------------------------------------------------------------------------------------------------------------------------------------------------------------------------------------------------------------------------------------------------------------------------------------------|
| pET21a-mtrE                      | MtrE NdeI F CATATGAATACTACATTGAAAACTACCTTGACCTCTGTTG<br>MtrE HindIII R AAGCTTTTTGCCGGTTTGGGTATCCCCTTTCAATCCGC                                                                                                                                                                                                                     |
| pET21a-mtrD                      | MtrD NdeI F CATATGGCTAAATTCTTTATCGACCGCCCCATTTTCG<br>MtrD HindIII R CTCGAGATATTGTTTATCGTCCGAACCGTTTATACCCG                                                                                                                                                                                                                        |
| pET21a NT-MtrC                   | MtrC NT NdeI F CATATGGGCTTTTTATGCTTCTAAGGCGATGCGTGCG<br>MtrC NT XhoI R CTCGAGTTTCGCTTCAGAAGCAGGTTTGGCTTCA                                                                                                                                                                                                                         |
| pGEX6p-3 NT-MtrC                 | MtrC NT BamHI F GGATCCGGCGGGCAGCCTGCGGGTCGGGAA<br>MtrC NT XhoI R CTCGAGTTATTTTCGCTTCAGAAGCAGGTTTGGCTTCAGATGCCGTC                                                                                                                                                                                                                  |
| pET24agIII-MtrC<br>NT            | MtrC NT NcoI F CCATGGGGCTTTTTATGCTTCTAAGGCGATGCGTGCG<br>MtrC NT XhoI R CTCGAGTTTCGCTTCAGAAGCAGGTTTGGCTTCA<br>gIII NdeI F CATATGAAAAAACTGCTGTTTCGCGATTCCG                                                                                                                                                                          |
| pET21aMtrC<br>Hairpin            | MtrC hairpin F NdeICATATGATCGACAGTTCCACTTATGAAGC<br>MtrC hairpin R XhoI CTCGAGAATGCGCGAACGGTTTCAGATTG                                                                                                                                                                                                                             |
| pET24a& pET21a -<br>mtrC Hairpin | MtrC hairpin NcoI F CCATGGAGATCGACAGTTCCACTTATGAAGG<br>MtrC hairpin XhoI R CTCGAGAATGCGCGAACGGTTTCAGATTG<br>gIII NdeI FCATATGAAAAAACTGCTGTTTCGCGATTCCG                                                                                                                                                                            |
| pACYCDuet-mtrE                   | MtrE BamHI F GGATCCGAATACTACATTGAAAACTACCTTG<br>MtrE HindIII R AAGCTTTTTGCCGGTTTGGGTATCCCCTTTCAATCCGC                                                                                                                                                                                                                             |
| pACYCDuet-mtrD                   | MtrD BamHI F GGATCCGGCTAAATTCTTTATCGACCGCCCCATTTTCG<br>MtrD SalI RGTTCGACATATTGTTTATCGTCCGAACCGTTTATACCCG                                                                                                                                                                                                                         |
| pACYCDuet-<br>mtrC/mtrE          | MtrC BamHI F GGATCCGGCTTTTTATGCTTCTAAGGCGATGCGTGCG<br>MtrC SalI R GTCGACTTTCGCTTCAGAAGCAGGTTTGGCTTCAG<br>MtrE NdeI F CATATGAATACTACATTGAAAACTACCTTGACCTCTGTTG<br>MtrE KpnI R GGTACCTTTGCCGGTTTGGGTATCCCCTTTCAATCCGC                                                                                                               |
| pACYCDuet-mtrC<br>hairpin/mtrE   | MtrE BamHI F GGATCCGAATACTACATTGAAAACTACCTTG<br>MtrE HindIII R AAGCTTTTTGCCGGTTTGGGTATCCCCTTTCAATCCGC<br>MtrC Hairpin gIIINdeI F CATATGAAAAAACTGCTGTTTCGCGATTCCG<br>MtrC hairpin XhoI R CTCGAGAATGCGCGAACGGTTTCAGATTG                                                                                                             |
| pACYCDuet-<br>mtrC/mtrD          | MtrC BamHIF GGATCCGGCTTTTTATGCTTCTAAGGCGATGCGTGCG<br>MtrC SalI R GTCGACTTTCGCTTCAGAAGCAGGTTTGGCTTCAG<br>MtrD NdeI F CATATGGCTAAATTCTTTATCGACCGCCCCATTTTCG<br>MtrD XhoI R CTCGAGATATTGTTTATCGTCCGAACCGTTTATACCCG                                                                                                                   |
| pACYCDuet-<br>mtrC/mtrD/mtrE     | MtrC BamHI F GGATCCGGCTTTTTATGCTTCTAAGGCGATGCGTGCG<br>MtrC SD linker EcoRI R GAATTCTTATTATTCTCTTATTTTCGCTTCAGAAGCAGG<br>MtrE EcoRI F GAATTCATGAATACTACATTGAAAACT<br>MtrE HindIII R AAGCTTTTTGCCGGTTTGGGTATCCCCTTTCAATCCGC<br>MtrD NdeI F (MCS2) CATATGGCTAAATTCTTTATCGACCGCCCCATTTTCG<br>MtrD KpnI R GGTACCATATTGTTTATCGTCCGAACCG |

**Notes:** sequences are 5' to 3'.

**TABLE S3: Primers used for mutagenesis of *mtrE* and *mtrD***

| <b>MtrE Derivatives</b> | <b>Primers</b>                                                                             |
|-------------------------|--------------------------------------------------------------------------------------------|
| E434K                   | For GCAGCTATTCGGCGAAAGGTGCGGCTTTG<br>Rev CAAAGCCGCACCTTTCGCCGAATAGCTGC                     |
| <b>MtrD Derivatives</b> |                                                                                            |
| D405K                   | For ATCGGCATCGTGGTCAAGGACGCGATTGTGGTG<br>Rev CACCACAATCGCGTCCTTGACCACGATGCCGAT             |
| D406K                   | For CGGCATCGTGGTCGATAAGGCGATTGTGGTGG<br>Rev CCACCACAATCGCCTTATCGACCACGATGCCG               |
| D405K/D406K             | For ATCGGCATCGTGGTCAAGAAGGCGATTGTGGTGGTT<br>Rev AACCACCACAATCGCCTTCTTGACCACGATGCCGAT       |
| K948E                   | For GTGATGGGTTTGAGTGCGGAGAACGCGATTCTGATTATC<br>Rev GATAATCAGAATCGCGTTCTCCGCACTCAAACCCATCAC |

**Notes:** these primers were used to introduce mutations into the *mtrE* and *mtrD* genes in the expression vectors pET21a or pACYC; for the *mtrD* D405K/D406K/K948E triple mutant, the D405K/D406K mutations were first introduced and then the K948E mutation was introduced.

Fig. S1. The MtrCDE-pump is activated by the MtrC-hairpin.

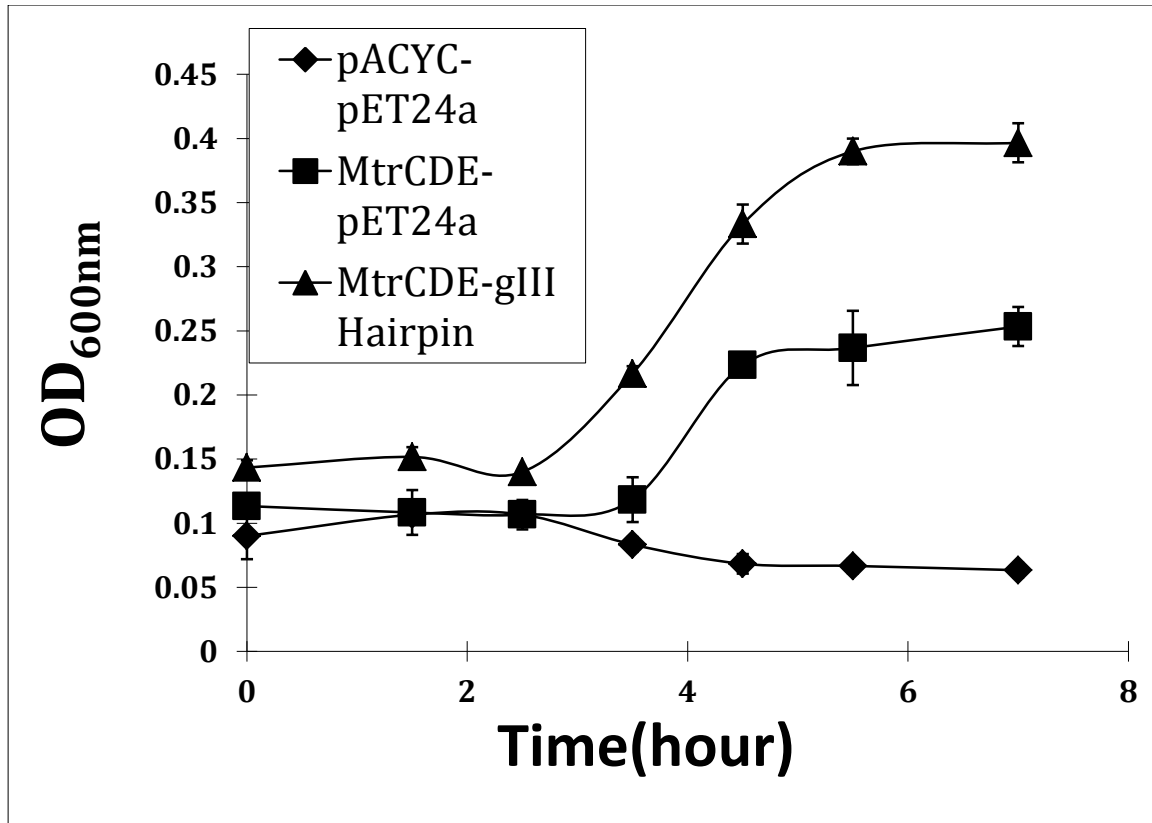

A series of curves showing the relative growth, measured as the OD<sub>600nm</sub> over 7.5 hours, for *E. coli* cells KAM3(DE3)/pACYC/pET24a, Kam3(DE3)/pACYC-MtrCDE/pET24a and KAM3(DE3)/ pACYC-MtrCDE/pET24a-gIII-Hairpin with 64 µg/ml Nafcillin. Cells expressing MtrCDE with the gIII-Hairpin had an enhanced rate of growth compared to cells expressing only MtrCDE. Each bar is the average of at least 3 measurements, with error bars representing the standard deviation of these measurements from the average.

**Fig. S2. Structural alignment of AcrB, MexB and MtrD.**

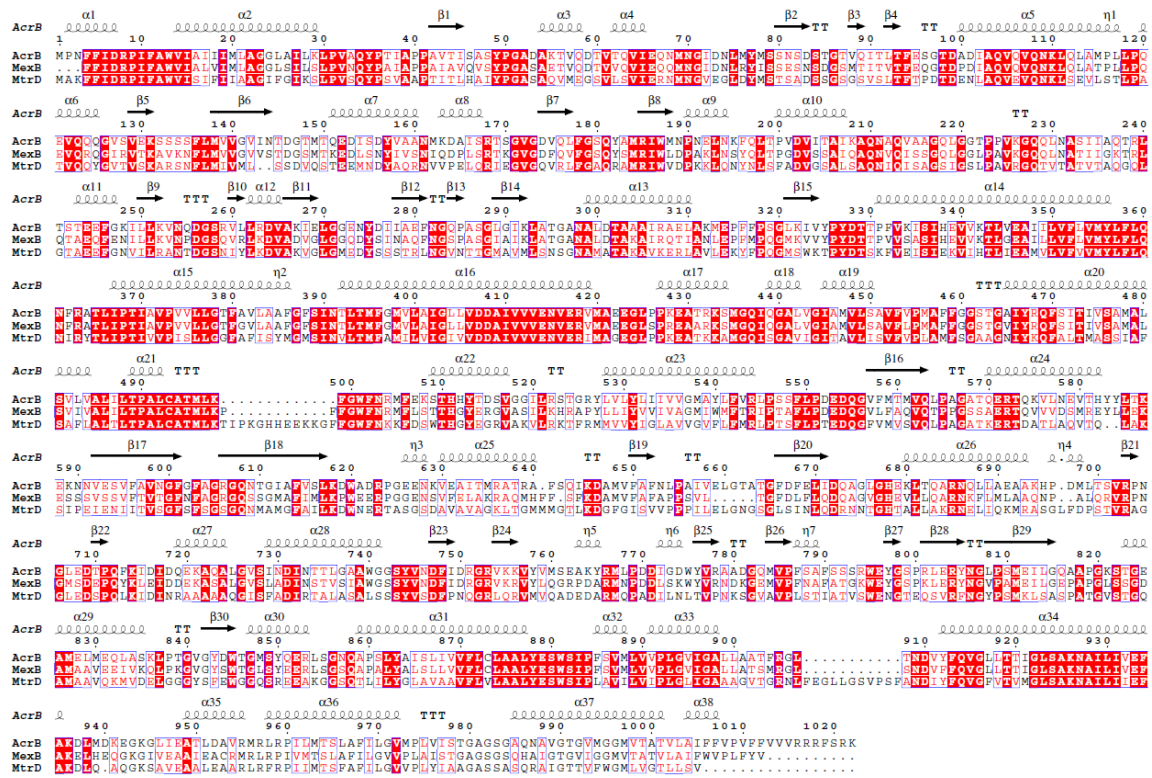

A structural alignment showing the secondary structural elements of AcrB (as per PDB 2DHH, chain A) was made with Esript.
